# Supplementary material for: Validation of maternal recall of number of antenatal care visits attended in rural Southern Nepal: a longitudinal cohort study
Source: PubMed Central journal article supplement (PMC10729047; doi:10.1136/bmjopen-2023-079029), 2023-12-09

## SUPPLEMENTAL TABLES AND FIGURES

**Supplemental Table 1.** Characteristics of participants with postpartum interview

| Characteristic                                                         | Observed all ANC visits (N=204) |          | Received ANC between observations (N=230) |          | Two sample t-test p-value | Total (N=434) |          |
|------------------------------------------------------------------------|---------------------------------|----------|-------------------------------------------|----------|---------------------------|---------------|----------|
|                                                                        | Mean (SD)                       | Range    | Mean (SD)                                 | Range    |                           | Mean (SD)     | Range    |
| Woman's age, years                                                     | 22.8 (4.3)                      | 16 to 41 | 22.3 (4.0)                                | 16 to 35 | 0.184                     | 22.5 (4.2)    | 16 to 41 |
| Total number of ANC visits observed                                    | 3.2 (2.0)                       | 1 to 10  | 5.6 (2.3)                                 | 2 to 14  | <0.01                     | 4.5 (2.5)     | 1 to 14  |
| Number of months between last ANC observation and postpartum interview | 11.6 (3.3)                      | 3 to 22  | 9.1 (2.5)                                 | 3 to 17  | <0.01                     | 10.3 (3.2)    | 3 to 22  |
|                                                                        | Observed all ANC visits (N=204) |          | Received ANC between observations (N=230) |          | Chi-square p-value        | Total (N=434) |          |
| Most recent pregnancy outcome                                          |                                 |          |                                           |          |                           |               |          |
| Miscarriage/abortion                                                   | 27                              | 13.2%    | 1                                         | 0.4%     | <0.01                     | 28            | 6.5%     |
| Stillbirth                                                             | 3                               | 1.5%     | 1                                         | 0.4%     |                           | 4             | 0.9%     |
| At least one live birth                                                | 174                             | 85.3%    | 228                                       | 99.1%    |                           | 402           | 92.6%    |
| 4 quantiles of SES                                                     |                                 |          |                                           |          |                           |               |          |
| 1                                                                      | 94                              | 46.1%    | 73                                        | 31.7%    | <0.01                     | 167           | 38.5%    |
| 2                                                                      | 39                              | 19.1%    | 35                                        | 15.2%    |                           | 74            | 17.1%    |
| 3                                                                      | 48                              | 23.5%    | 84                                        | 36.5%    |                           | 132           | 30.4%    |
| 4                                                                      | 23                              | 11.3%    | 38                                        | 16.5%    |                           | 61            | 14.1%    |
| Is this the woman's first pregnancy?                                   |                                 |          |                                           |          |                           |               |          |
| No                                                                     | 153                             | 75.0%    | 145                                       | 63.0%    | <0.01                     | 298           | 68.7%    |
| Yes                                                                    | 51                              | 25.0%    | 85                                        | 37.0%    |                           | 136           | 31.3%    |
| Did the woman receive any years of education?                          |                                 |          |                                           |          |                           |               |          |
| No                                                                     | 139                             | 68.1%    | 120                                       | 52.2%    | <0.01                     | 259           | 59.7%    |
| Yes                                                                    | 65                              | 31.9%    | 110                                       | 47.8%    |                           | 175           | 40.3%    |
| Trimester at enrollment                                                |                                 |          |                                           |          |                           |               |          |
| 1-3 months                                                             | 81                              | 39.7%    | 109                                       | 47.4%    | 0.1                       | 190           | 43.8%    |
| 4-6 months                                                             | 117                             | 57.4%    | 119                                       | 51.7%    |                           | 236           | 54.4%    |
| 7-9 months                                                             | 6                               | 2.9%     | 2                                         | 0.9%     |                           | 8             | 1.8%     |

**Supplemental Figure 1.** Agreement between numbers of ANC visits observed at health posts and maternal report at postpartum interview in (A) the entire cohort (n = 402) and (B) the subgroup with all ANC observed (n = 174).

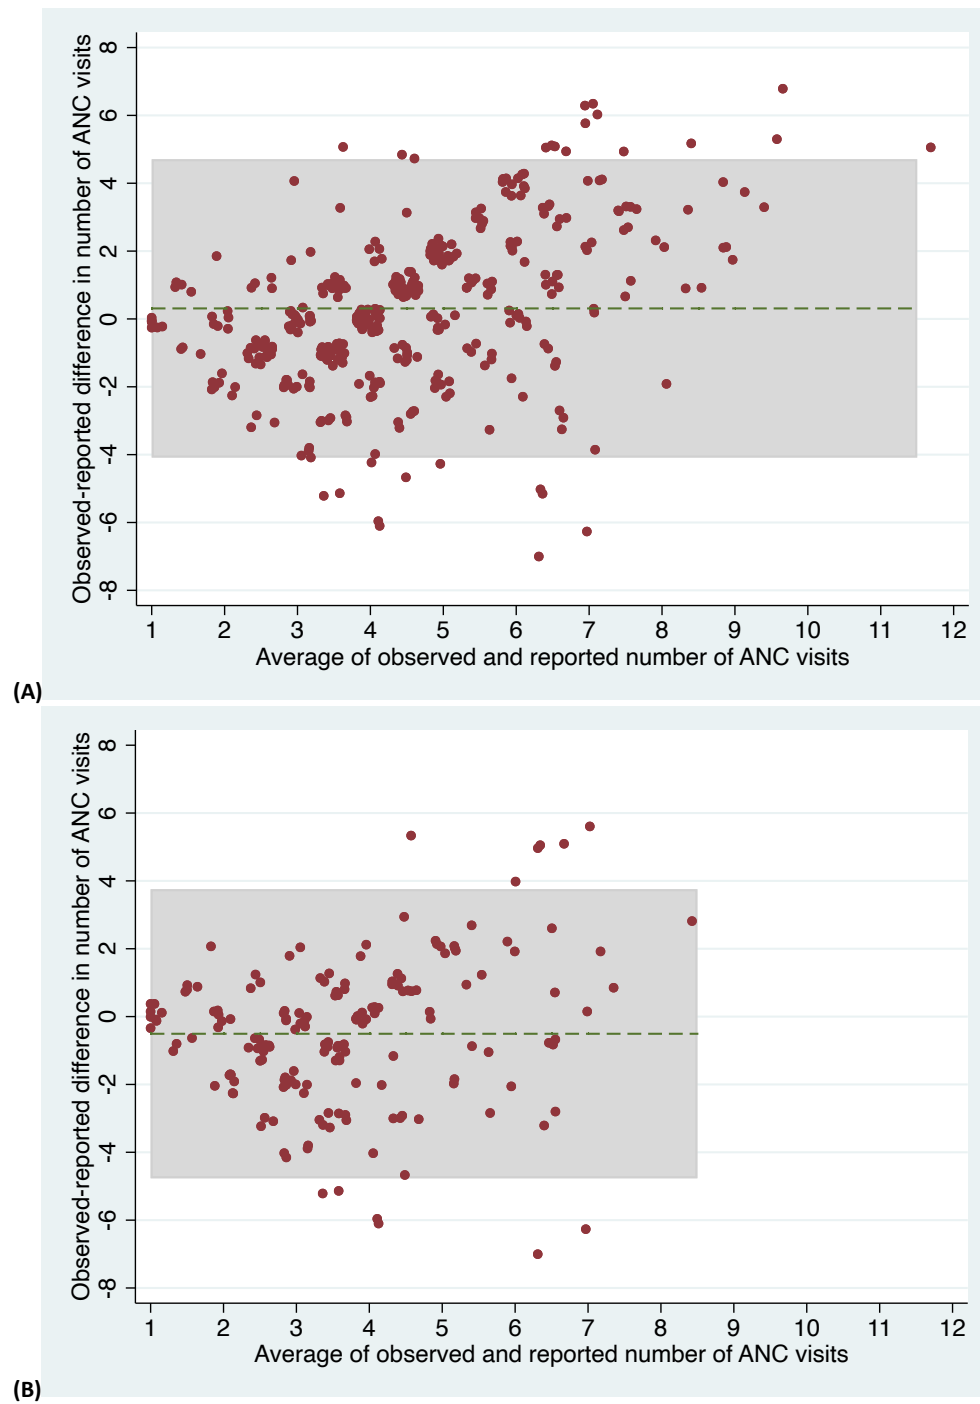

**Supplemental Figure 2.** Histogram of observed number of ANC visits (n = 402).

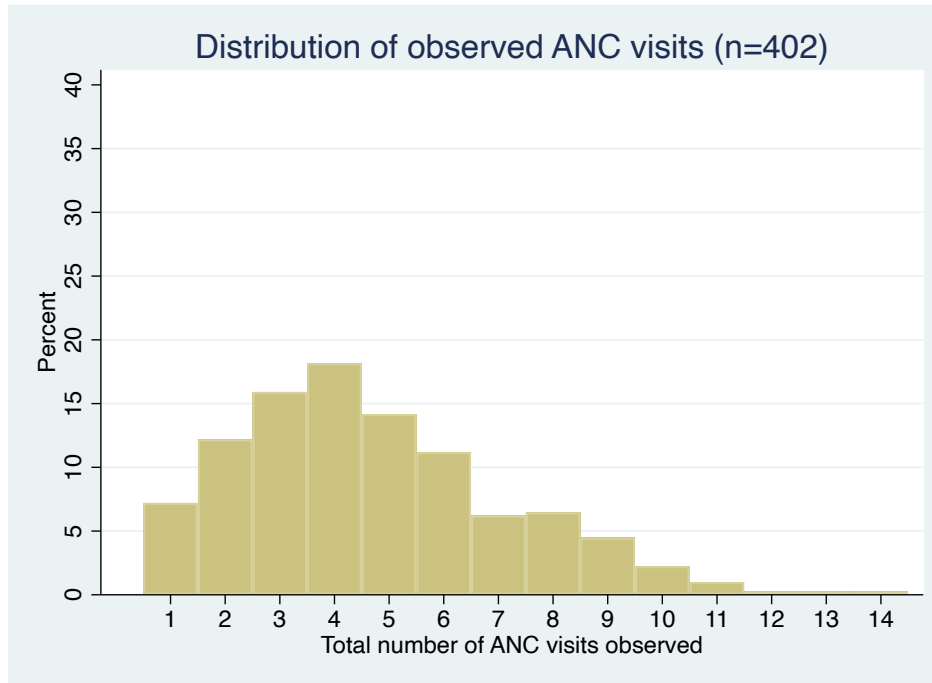

**Supplemental Figure 3.** Histogram of reported number of ANC visits (n = 402).

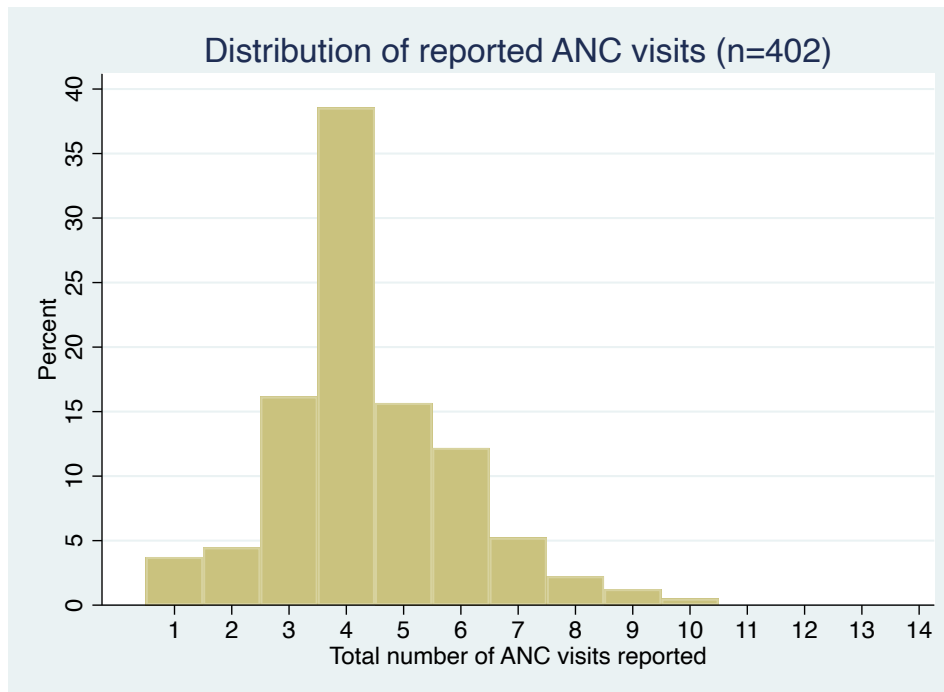

Supplement: bmjopen-2023-079029supp001.pdf [file bmjopen-2023-079029supp001.pdf]
